# Supplementary material for: Self-Assembly of a Rare High Spin FeII/PdII Tetradecanuclear Cubic Cage Constructed via the Metalloligand Approach
Source: MDPI journal article supplement (doi:10.3390/chemistry4020038), 2022-05-26
Supplement: s1 [file s1]

Archive with 1 entries (1 files):
- chemistry-1737178-supplementary.pdf
