# Supplementary material for: Self-Assembly of a Rare High Spin FeII/PdII Tetradecanuclear Cubic Cage Constructed via the Metalloligand Approach
Source: MDPI journal article supplement (doi:10.3390/chemistry4020038), 2022-05-26
Supplement: s1 [file s1 › chemistry-1737178-supplementary.pdf]

## Supporting Information

### Self-Assembly of a Rare High Spin Fe<sup>II</sup>/Pd<sup>II</sup> Tetradecanuclear Cubic Cage Constructed via the Metalloligand Approach

Hyunsung Min <sup>1</sup>, Alexander R. Craze <sup>1,2</sup>, Takahiro Tairo<sup>3</sup>, Matthew J. Wallis<sup>1</sup>, Mohan M. Bhadbhade<sup>4</sup>, Ruoming Tian<sup>4</sup>, Daniel J. Fanna<sup>5</sup>, Richard Wuhrer<sup>5</sup>, Shinya Hayami<sup>3</sup>, Jack K. Clegg<sup>6</sup>, Christopher E. Marjo<sup>4</sup>, Leonard F. Lindoy<sup>7</sup> and Feng Li. <sup>1,\*</sup>

<sup>1</sup>School of Science, Western Sydney University, Locked Bag 1797, Penrith, Sydney, NSW 2751, Australia; 17792947@student.westernsydney.edu.au (H.M.); alexander.craze@chem.ox.ac.uk (A.R.C.); 17232236@student.westernsydney.edu.au (M.J.W.)

<sup>2</sup>Department of Chemistry, University of Oxford, Chemistry Research Laboratory, 12 Marsfield Road, Oxford OX1 3TA, UK

<sup>3</sup>Department of Chemistry, Graduate School of Science and Technology, Kumamoto University, 2-39-1 Kurokami, Chuoku, Japan; 215d8108@st.kumamoto-u.ac.jp (T.T); hayami@kumamoto-u.ac.jp (S.H.)

<sup>4</sup>Mark Wainwright Analytical Centre, University of New South Wales, Kensington, NSW, 2052, Australia; m.bhadbhade@unsw.edu.au (M.M.B.); r.tian@unsw.edu.au (R.T.); c.marjo@unsw.edu.au (C.E.M)

<sup>5</sup>Advanced Materials Characterisation Facility, Western Sydney University, Locked Bag 1797, Penrith, Sydney, NSW 2751, Australia; d.fanna@westernsydney.edu.au (D.J.F.); Richard.wuhrer@westernsydney.edu.au (R.W.)

<sup>6</sup>School of Chemistry and Molecular Bioscience, The university of Queensland, Brisbane, St Lucia, QLD 4072, Australia; d.fanna@westernsydney.edu.au

<sup>7</sup>School of Chemistry, University of Sydney, NSW 2006, Australia; leonard.lindoy@sydney.edu.au

\*Correspondence: Feng.Li@westernsydney.edu.au; Tel: +61-2-9685-9987

## Table of Contents

**Figure S1.**  $^1\text{H}$  NMR spectrum of 1-(pyridine-4-yl)-1*H*-imidazole-4-carbaldehyde.

**Figure S2.**  $^{13}\text{C}$  NMR spectrum of 1-(pyridine-4-yl)-1*H*-imidazole-4-carbaldehyde.

**Figure S3.**  $^1\text{H}$  NMR spectra of ligand **2**.

**Figure S4.**  $^{13}\text{C}$  NMR spectra of ligand **2**.

**Figure S5.** HR ESI-MS spectrum of  $\text{FeL}(\text{BF}_4)_2$  (**3**) in acetonitrile.

**Figure S6.** Isotopic pattern of  $[\text{FeL}(\text{BF}_4)]^{1+}$  (bottom) and simulated distribution (top)

**Figure S7.** Isotopic pattern of  $[\text{FeL}]^{2+}$  (bottom) and simulated distribution (top)

**Figure S8.** HR-ESI-MS spectra of  $[\text{Fe}_8\text{Pd}_6\text{L}_8(\text{BF}_4)_{28}]$  (**1**) in acetonitrile. The inset shows the isotopic pattern for  $[\text{Fe}_8\text{Pd}_6\text{L}_8(\text{BF}_4)_{20}]^{8+}$  (bottom) with simulated pattern (top).

**Figure S9.** Schematic highlighting of the bonding axes of the  $i^{\text{th}}$  and  $j^{\text{th}}$  pyridine moieties in the metalloligand (**3**).

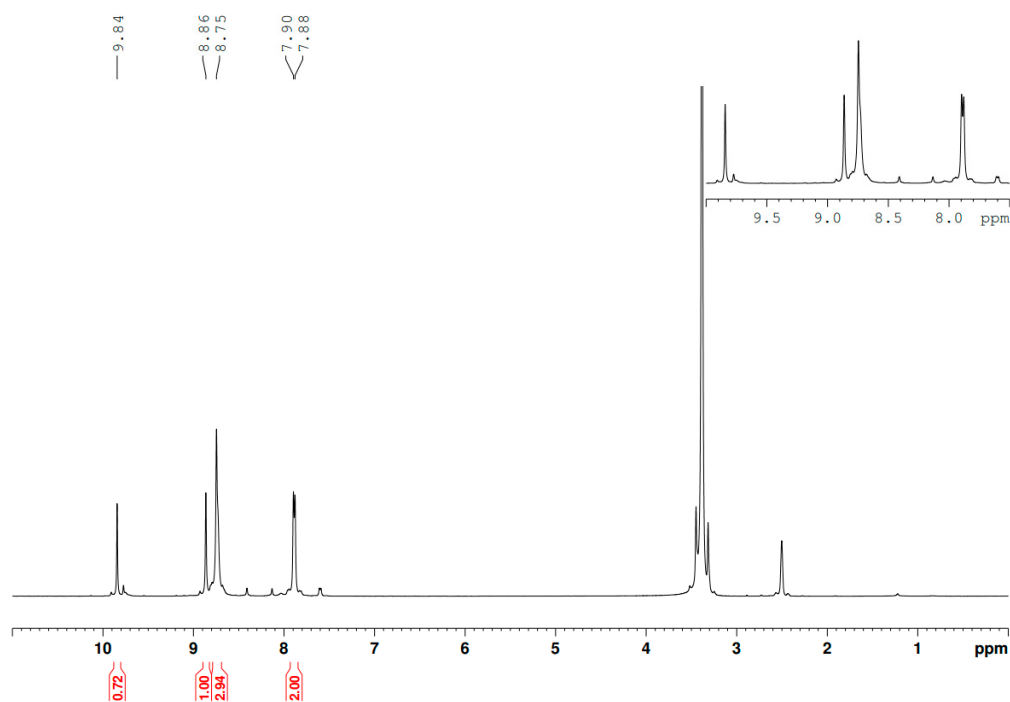

**Figure S1.**  $^1\text{H}$  NMR spectrum of 1-(pyridine-4-yl)-1*H*-imidazole-4-carbaldehyde.

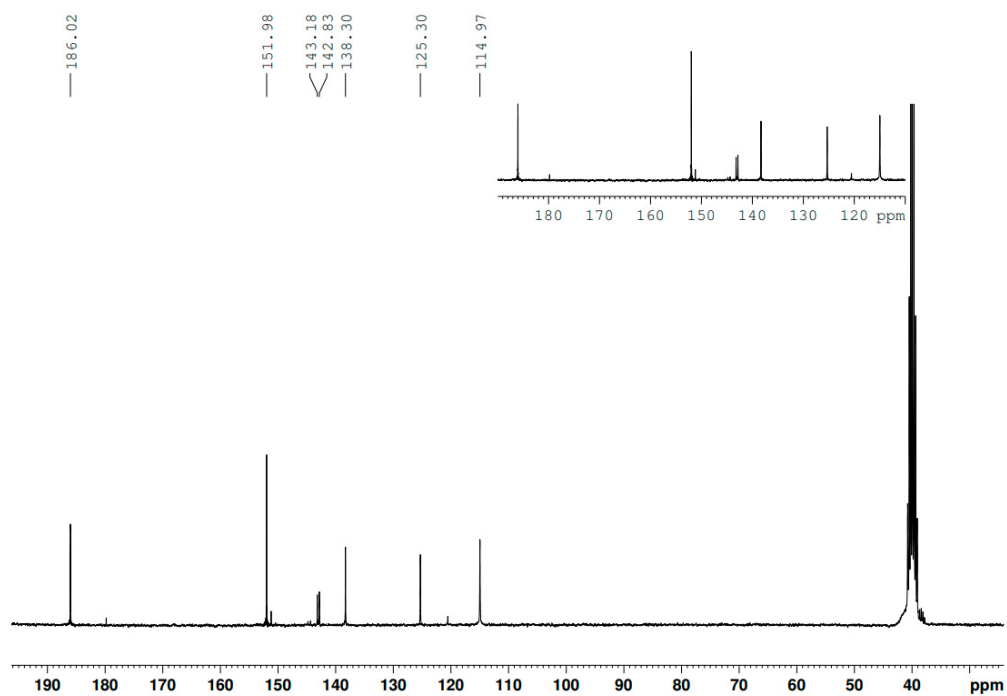

**Figure S2.**  $^{13}\text{C}$  NMR spectrum (DMSO- $\text{d}_6$ , 75MHz) of 1-(pyridine-4-yl)-1*H*-imidazole-4-carbaldehyde.

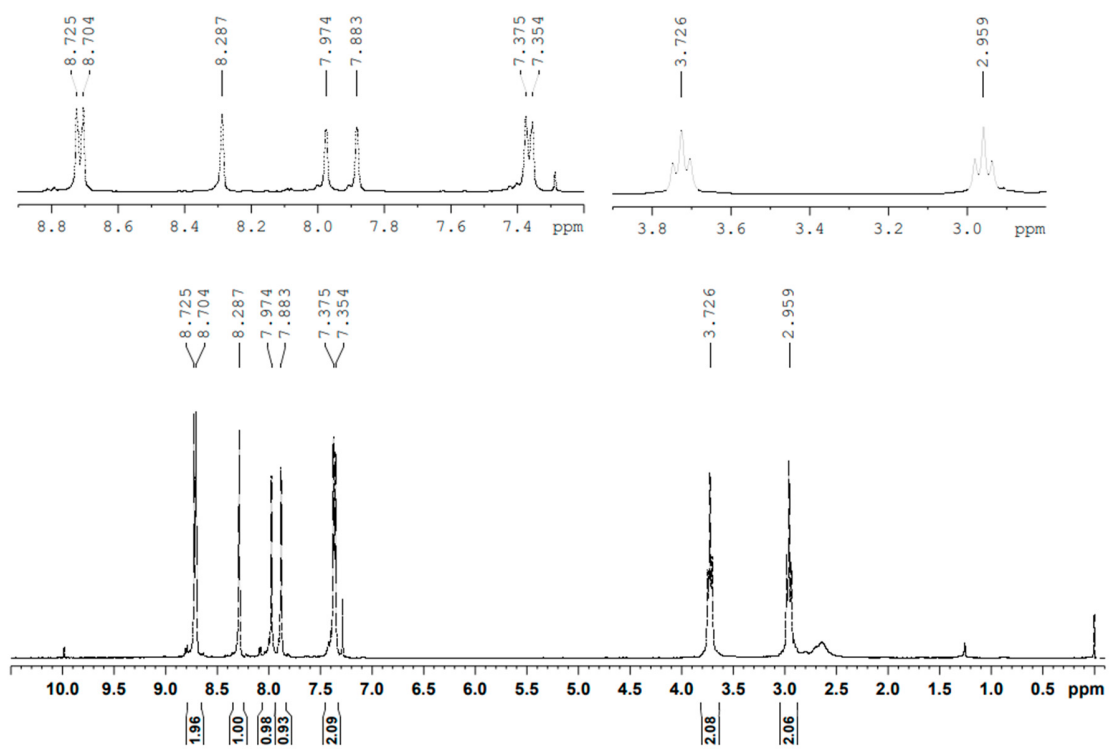

**Figure S3.**  $^1\text{H}$  NMR spectrum of ligand 2 ( $\text{CDCl}_3$ , 300MHz)

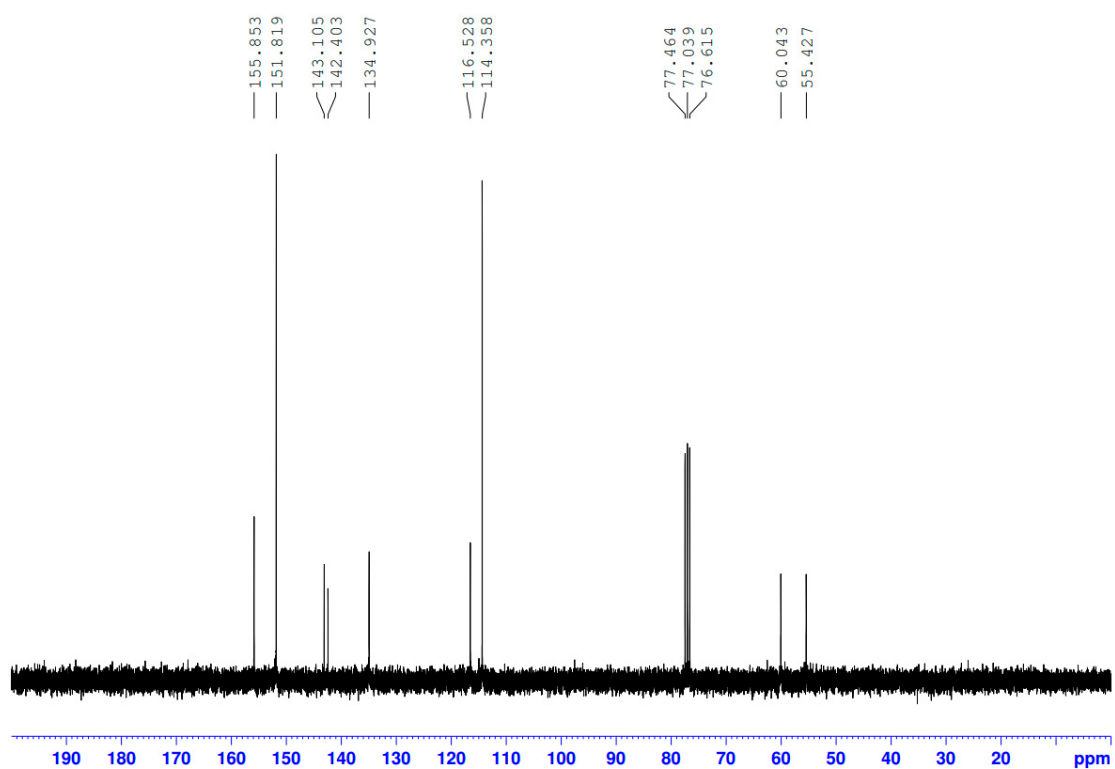

**Figure S4.**  $^{13}\text{C}$  NMR spectrum of ligand **2** ( $\text{CDCl}_3$ , 75MHz)

2020\_02\_10\_HSM02\_FeL

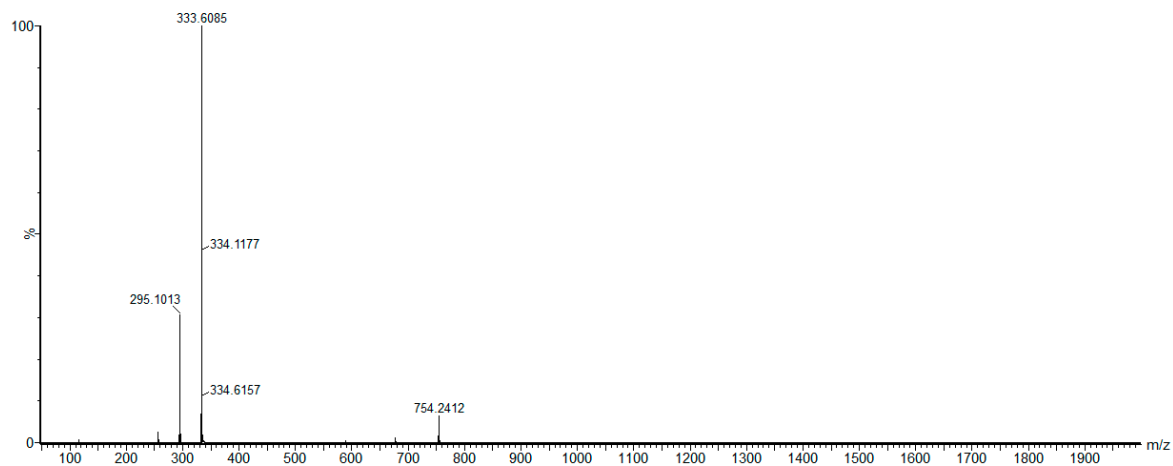

**Figure S5.** HR ESI-MS spectrum of  $\text{FeL}(\text{BF}_4)_2$  (**3**) in acetonitrile.

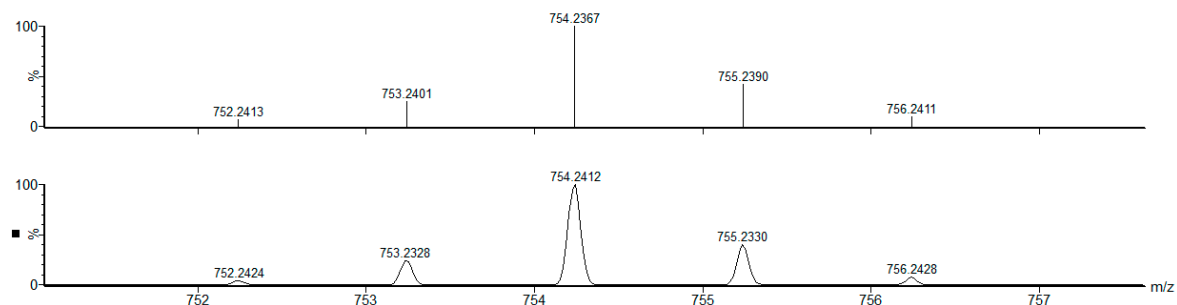

**Figure S6.** Isotopic pattern of  $[\text{FeL}(\text{BF}_4)]^{1+}$  (bottom) and simulated distribution (top).

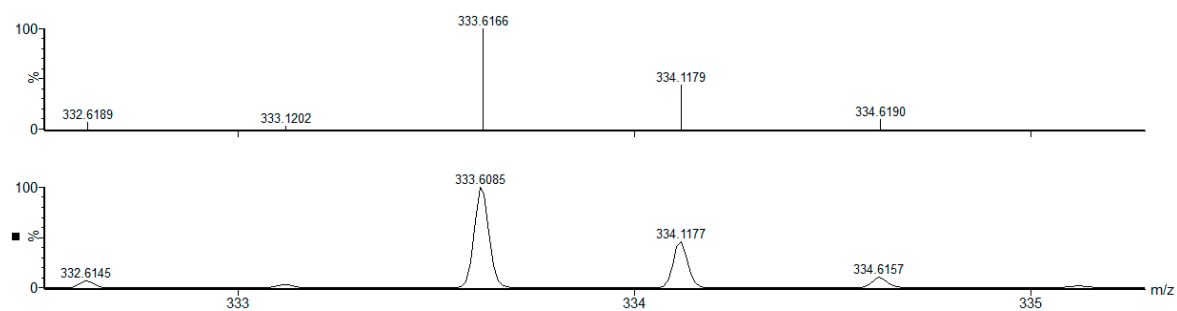

**Figure S7.** Isotopic pattern of  $[\text{FeL}]^{2+}$  (bottom) and simulated distribution (top).

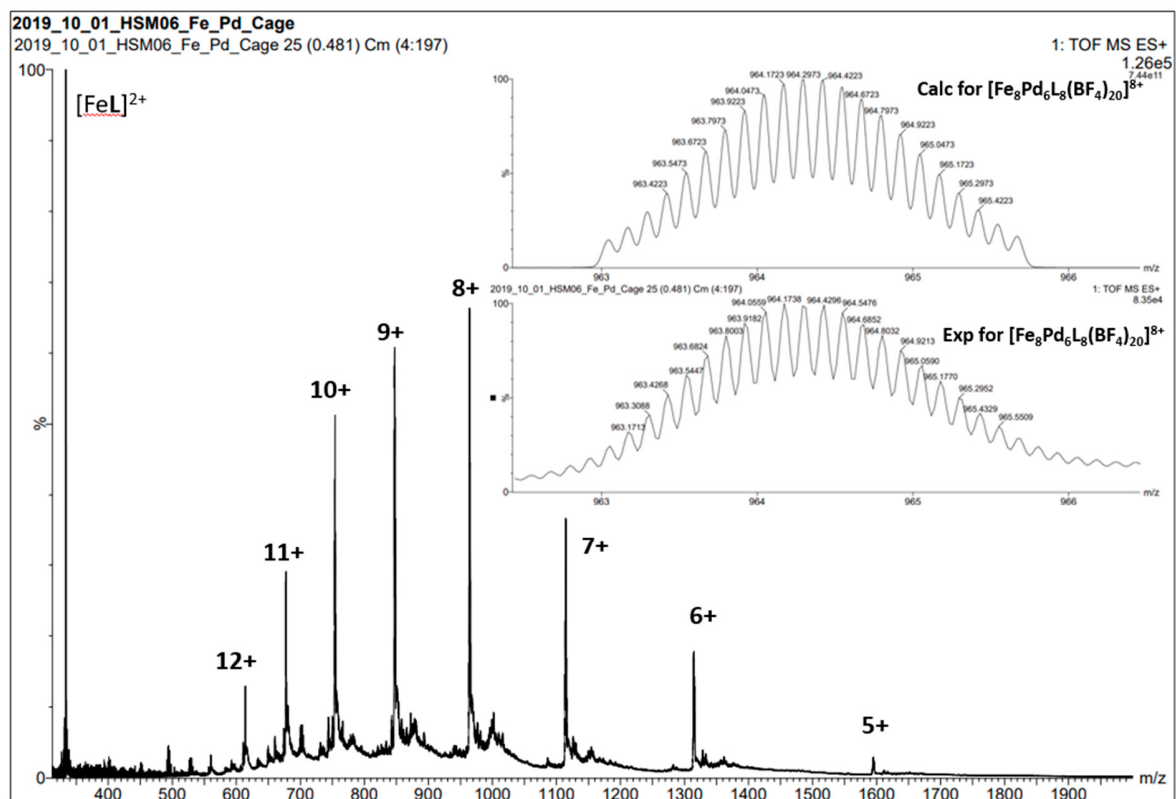

**Figure S8.** HR-ESI-MS spectra of  $[\text{Fe}_8\text{Pd}_6\text{L}_8(\text{BF}_4)_{28}]$  (1) in acetonitrile. The inset shows the isotopic pattern for  $[\text{Fe}_8\text{Pd}_6\text{L}_8(\text{BF}_4)_{20}]^{8+}$  (bottom) with simulated pattern (top).

### Calculation of mutual secondary bonding axis angles

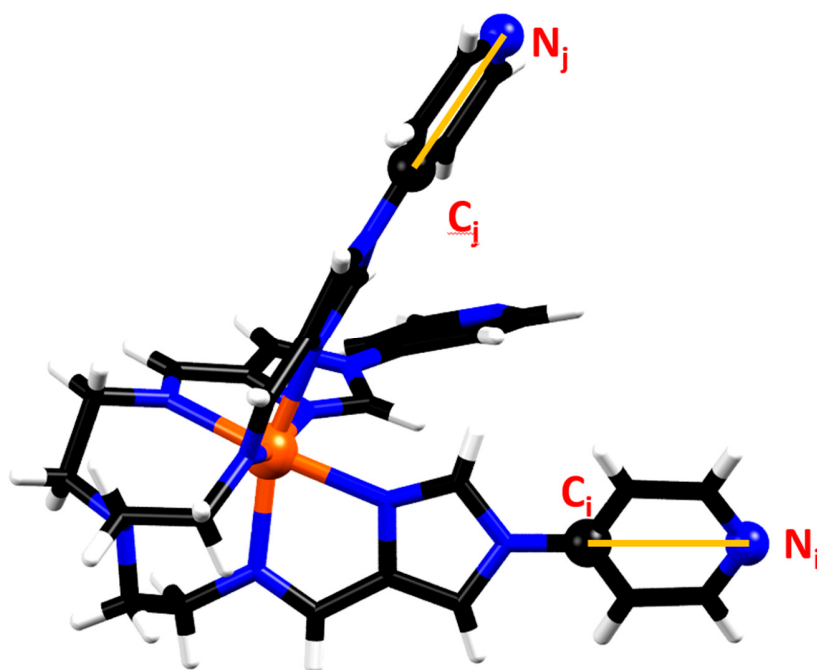

**Figure S9.** Schematic highlighting of the bonding axes of the  $i^{\text{th}}$  and  $j^{\text{th}}$  pyridine moieties in the metalloligand (3).

For each given angle, the coordinates of four atoms were selected, the  $i^{\text{th}}$  secondary N atom and the opposite C in the same pyridine ( $N_i$  and  $C_i$ ), as well as the equivalent atoms in the  $j^{\text{th}}$  pyridine ( $N_j$  and  $C_j$ ).

This system of coordinates was subjected to several translations and reorientations for the calculation of the given angle as follows.

- All four points were translated by the same distance, such that  $C_i$  occupied the origin of the Cartesian system.
- Both reference atoms in the  $j^{\text{th}}$  pyridine were translated, such that  $C_j$  occupied the origin.
- All coordinates were rotated about the z axis, such that the  $N_i$  sat in the xz plane.
- All coordinates were rotated about the y axis, such that the  $N_i$  sat in the x axis.
- All coordinates were rotated about the x axis, such that  $N_j$  sat in the xy plane.

The angle between bonding axes was then calculated using the  $N_j$  coordinates by  $\arctan(y/x)$ .
